# Supplementary material for: ATM Suppresses SATB1-Induced Malignant Progression in Breast Epithelial Cells
Source: PubMed Central journal article supplement (PMC3519734; doi:10.1371/journal.pone.0051786), 2012-12-10

# Supplementary Figure 1

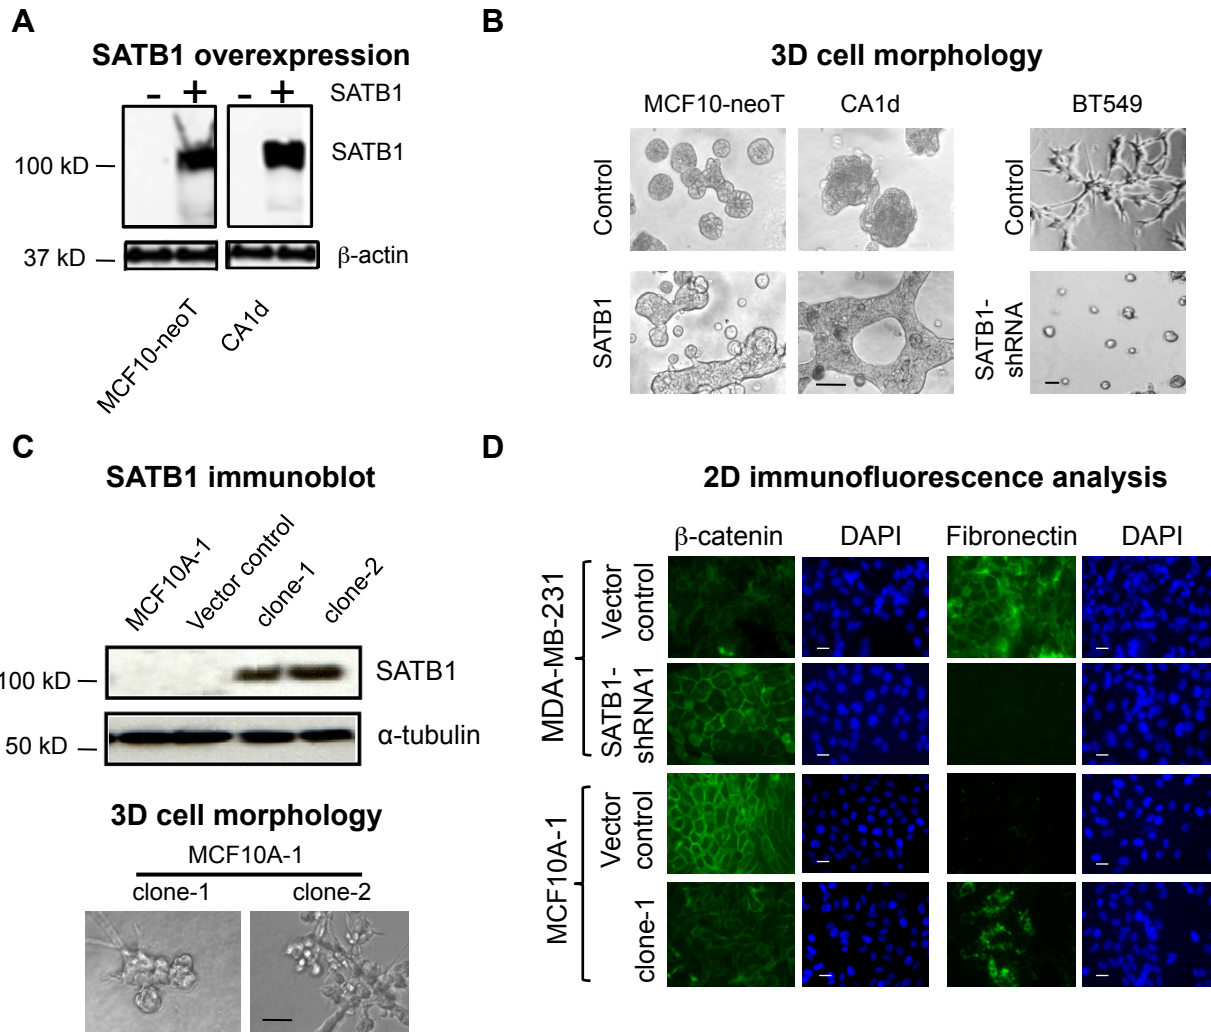

Supplement: pone.0051786.s001.pdf [file pone.0051786.s001.pdf]
